# Supplementary material for: Is 2-D turbulence relevant in the atmosphere?
Source: Frontiers journal article supplement (doi:10.3389/fbinf.2022.836981), 2010-05-01
Supplement: Image_2.pdf [file Image_2.pdf]

## Supplementary Figure2

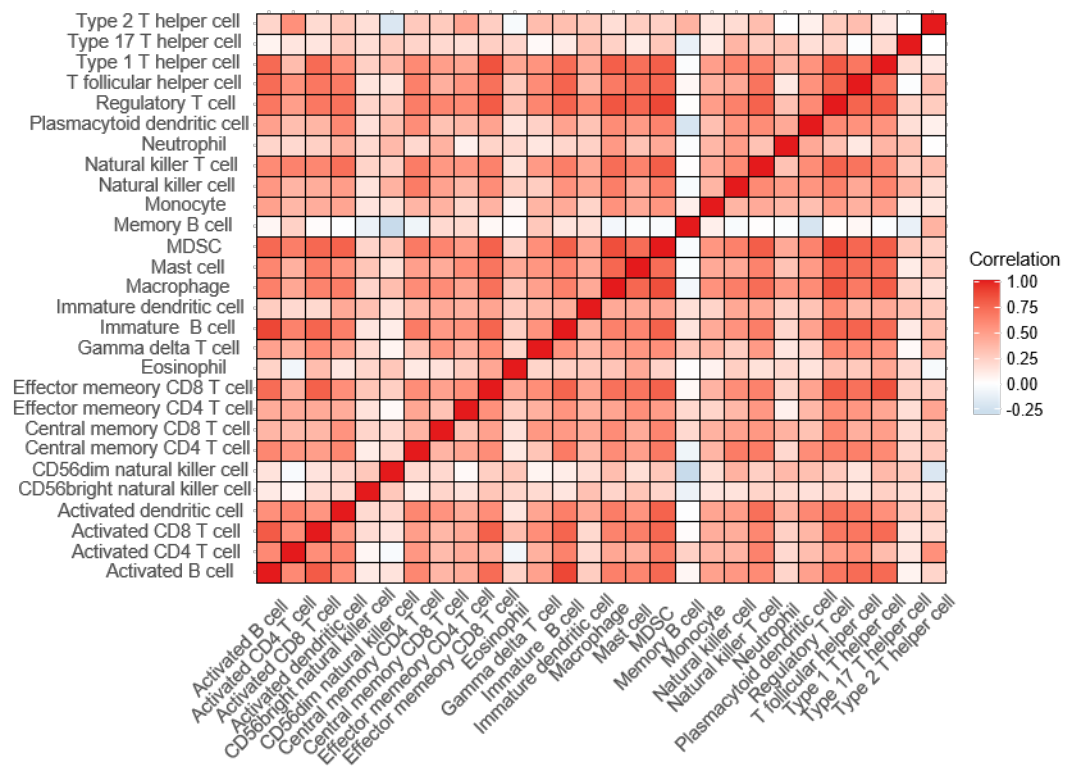

Correlation analysis of 28 tumor-infiltrating cells.
