# Supplementary material for: Is 2-D turbulence relevant in the atmosphere?
Source: Frontiers journal article supplement (doi:10.3389/fbinf.2022.836981), 2010-05-01
Supplement: Image_3.pdf [file Image_3.pdf]

### Supplementary Figure 3

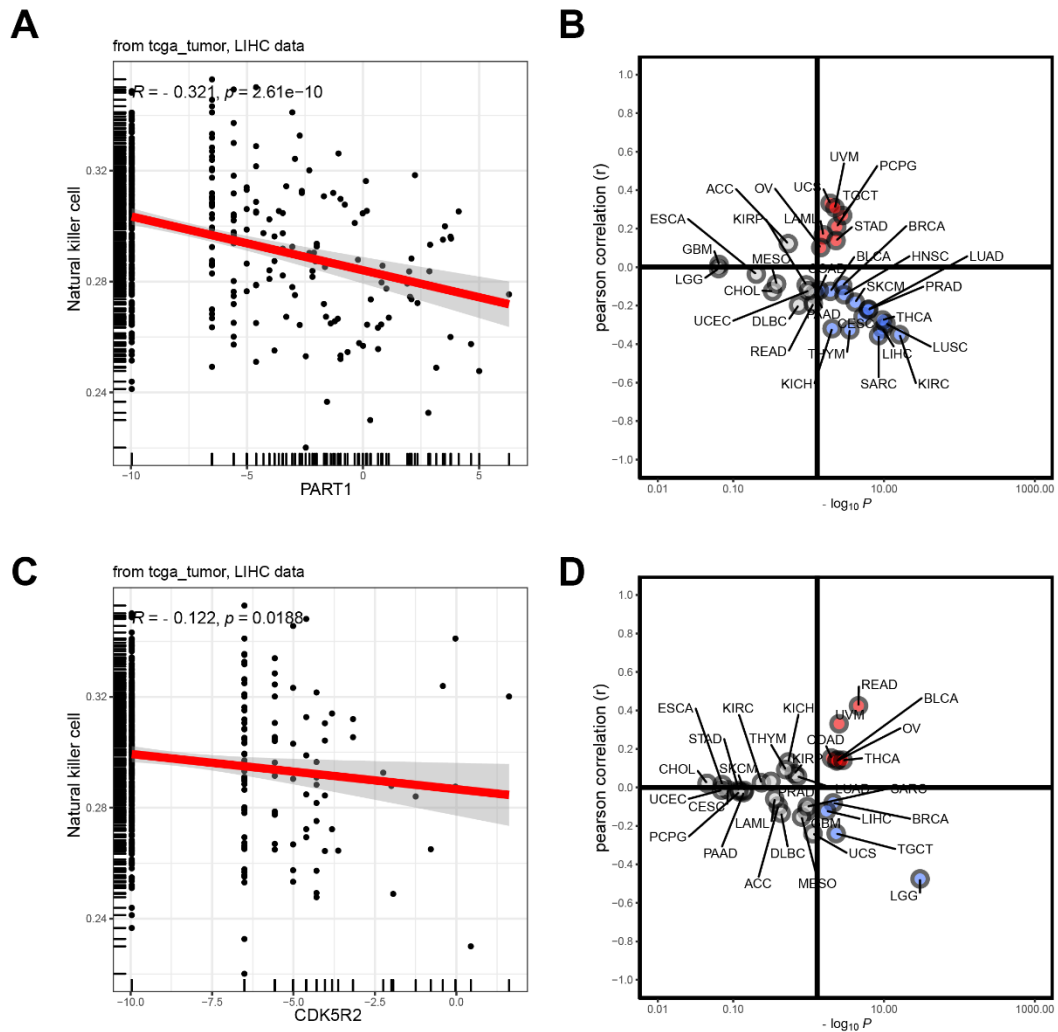

Relationship of PART1 and CDK5R2 expression with the proportion of NK cells in the GTBA database. **(A)** Scatter plots illustrate the correlation between PART1 and NK cells ( $P = 2.6e-10$ ,  $R = -0.321$ ). **(B)** Circle diagram illustrate the correlation between PART1 and NK cells in pan-cancer. Red, positive correlation; blue, negative correlation. **(C)** Scatter plots illustrate the correlation between CDK5R2 and NK cells ( $P = 0.0188$ ,  $R = -0.122$ ). **(D)** Circle diagram illustrate the correlation between CDK5R2 and NK cells in pan-cancer. Red, positive correlation; blue, negative correlation.
