# Supplementary material for: Is 2-D turbulence relevant in the atmosphere?
Source: Frontiers journal article supplement (doi:10.3389/fbinf.2022.836981), 2010-05-01
Supplement: Image_4.pdf [file Image_4.pdf]

## Supplementary Figure4

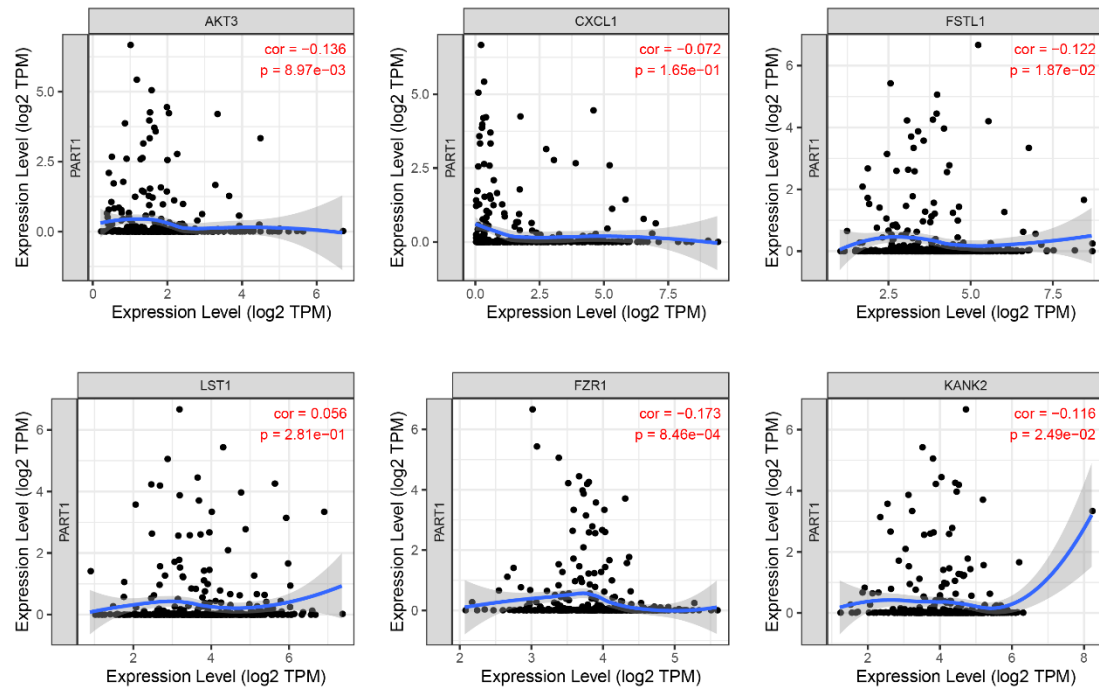

Correlations between PART1 and the surface markers of NK cells (AKT3, CXCL1, FSTL1, LST1, FZR1, and KANK2) for HCC in TIMER.
